# Supplementary material for: Silver nanoprobe for sensitive and selective colorimetric detection of dopaminevia robust Ag–catechol interaction
Source: Royal Society of Chemistry journal article supplement (doi:10.1039/c0cc03700a), 2010-11-17
Supplement: c0cc03700a.pdf [file c0cc03700a.pdf]

## SUPPORTING INFORMATION

# Silver Nanoprobe for Sensitive and Selective Colorimetric Detection of Dopamine via Robust Ag-catechol Interaction

### EXPERIMENTAL SECTION

#### Chemicals and Materials.

Silver nitrate ( $\text{AgNO}_3$ ), sodium citrate dihydrate ( $\text{Na}_3\text{C}_6\text{H}_5\text{O}_7 \cdot 2\text{H}_2\text{O}$ ), and sodium borohydride ( $\text{NaBH}_4$ ) were purchased from Alfa Aesar. Dopamine hydrochloride, and 4-(2-hydroxyethyl) piperazine-1-ethanesulfonic acid (HEPES) were obtained from Sigma-Aldrich. All other reagents were of analytical reagent grade, and used as received. Nanopure water (18.2 M $\Omega$ ; Millipore Co., USA) was used throughout the experiment.

**Instrumentation.** The UV-Vis absorption spectra and fluorescence spectra were recorded using a JASCO V-550 UV/Visible and a JASCO FP6500 spectrophotometer (JASCO International Co., LTD., Tokyo, Japan).

**Assay procedure.** Silver nanoparticles were synthesized by reduction of  $\text{AgNO}_3$  by  $\text{NaBH}_4$  in the presence of sodium citrate.<sup>1</sup> In a typical procedure, 100  $\mu\text{L}$  AgNPs was mixed with 300  $\mu\text{L}$  of 10 mM HEPES buffer at pH 6.8. 10  $\mu\text{L}$  of different concentration of dopamine was added, and equilibrated for 90 min at room temperature before the spectral measurements. UV-Vis absorption spectra were recorded using a Varian Cary 300 spectrophotometer equipped with a 1-cm path length quartz cell, and light scattering spectra were recorded by synchronously scanning the excitation and emission monochromators from 300 to 700 nm (i.e.,  $\Delta\lambda=0$ ) using an FP-6500 spectrofluorometer, and TEM images were recorded using a FEI TECNAI G2 20 high-resolution transmission electron microscope operating at 200 kV.

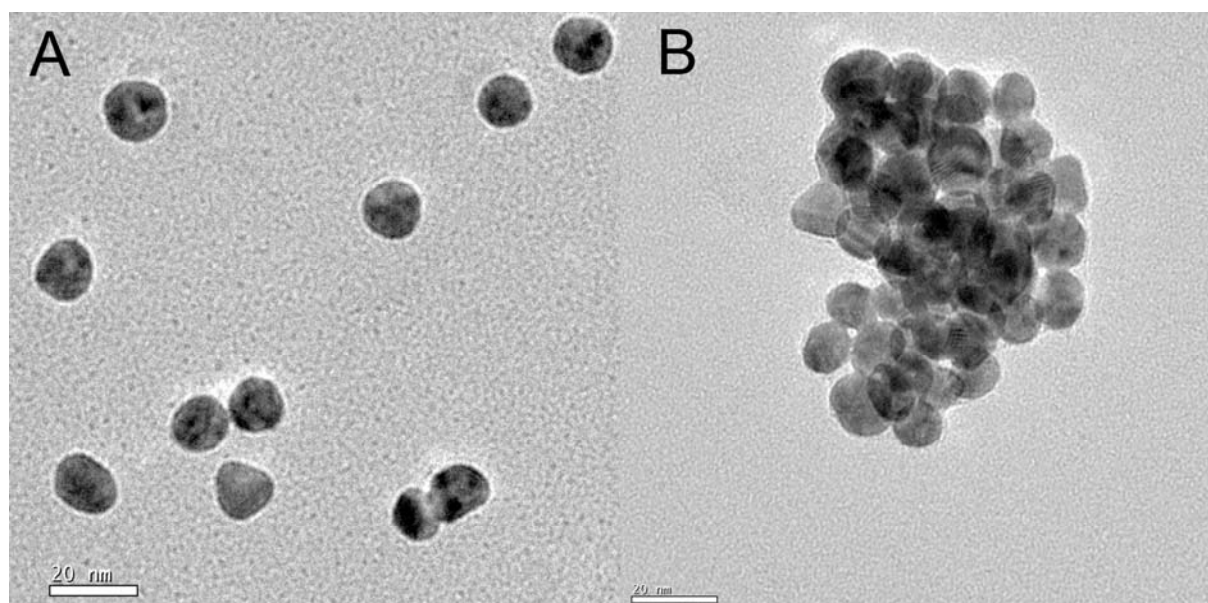

Figure S1. TEM graphs of AgNPs in the absence (A) and presence (B) of  $4.0 \times 10^{-5}$  M dopamine. Scale bars, 200 nm.

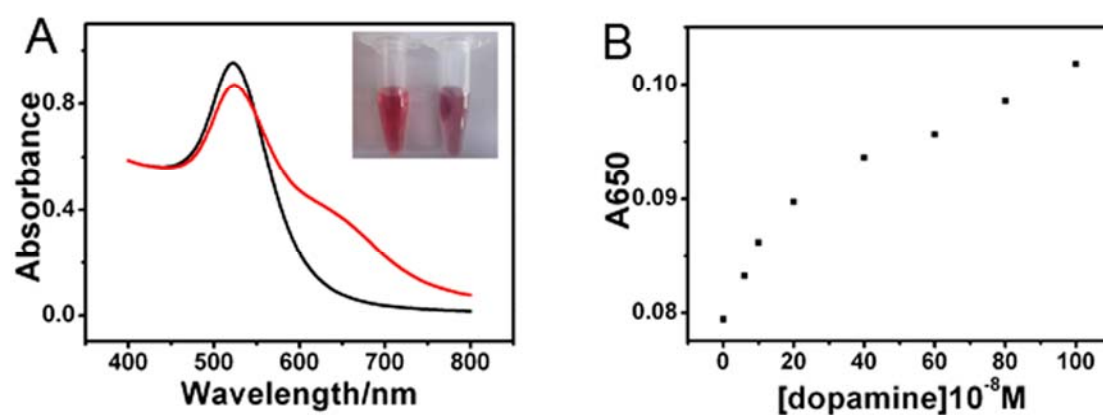

Figure S2. (A) UV-Vis absorption of AuNPs in the absence (Black) and presence (Red) of  $2 \times 10^{-6}$  M dopamine. Inset is the corresponding visual color changes. (B) Plots of the absorbance of AuNPs at 650 nm as a function of the dopamine concentration in the lower concentration range (0–1  $\mu$ M).

References:

- 1 R. C. Doty, T. R. Tshikhudo, M. Brust, D. G. Fernig, *Chem. Mater.*, 2005, **17**, 4630.
